# Supplementary material for: An updated systematic review and meta-analysis on efficacy of Sofosbuvir in treating hepatitis C-infected patients with advanced chronic kidney disease
Source: PubMed Central journal article supplement (PMC7875415; doi:10.1371/journal.pone.0246594), 2021-02-10
Supplement: pone.0246594.s002.pdf [file pone.0246594.s002.pdf]

## **Appendix. Description of search strategy in PubMed**

We used controlled vocabulary (e.g. Mesh terms for MEDLINE) and also used PICO strategy, including items like, the population (Renal disease, hemodialysis, Hepatitis C), intervention (Sofosbuvir, direct acting antiviral).

("Hepatitis C"[Mesh]) OR ("Hepatitis C, Chronic"[Mesh]))

**OR**

((Parenterally-Transmitted Non-A, Non-B Hepatitis [Title/Abstract]) OR (PT-NANBH [Title/Abstract]))

**AND**

("Renal Dialysis"[Mesh]) OR ("Renal Replacement Therapy"[Mesh]) OR ("Renal Insufficiency"[Mesh]) OR ("Renal Insufficiency, Chronic"[Mesh]))

**OR**

((Renal Dialyses [Title/Abstract]) OR (Hemodialysis [Title/Abstract]) OR (Dialysis, Extracorporeal [Title/Abstract]) OR (Renal Replacement Therapies [Title/Abstract]) OR (Kidney Replacement Therapies [Title/Abstract]) OR (Kidney Replacement Therapy [Title/Abstract]) OR (Renal Insufficiencies [Title/Abstract]) OR (Kidney Insufficiency [Title/Abstract]) OR (Kidney Failure [Title/Abstract]) OR (Renal Failure [Title/Abstract]) OR (Acute Kidney Injury [Title/Abstract]) OR (Chronic Renal Insufficiencies [Title/Abstract]) OR (Chronic Kidney Insufficiency [Title/Abstract]) OR (Chronic Kidney Diseases [Title/Abstract]) OR (Chronic Renal Diseases [Title/Abstract]))

**AND**

("Sofosbuvir"[Mesh]) OR (PSI -7977[Title/Abstract])) OR (GS-7977 [Title/Abstract])) OR (Sovaldi [Title/Abstract]) OR (direct acting antivirals [Title/Abstract]) OR (NS5B polymerase inhibitors [Title/Abstract]) OR (direct acting nucleotide polymerase inhibitor [Title/Abstract]))

**S1 Table. Detailed characteristics of included studies in meta-analysis of SVR12 rate in HCV-infected patients with advanced chronic kidney disease.**

| Firth author/year  | Country | No. of patients | Recruitment period | Mean Age (SD) | Mean baseline HCV RNA (log 10 IU/ml)               | Cirrhosis N (%) | No. of patient on dialysis / Total patient | Genotype (%)                                        | Treatment strategy & duration of treatment                             | Dose (mg)                   | SVR 12 (%) | SVR 24 (%) | No. of patient with AE (%)                                |
|--------------------|---------|-----------------|--------------------|---------------|----------------------------------------------------|-----------------|--------------------------------------------|-----------------------------------------------------|------------------------------------------------------------------------|-----------------------------|------------|------------|-----------------------------------------------------------|
| Taneja 2018 [24]   | India   | 65              | 2016               | 49 (13)       | 1.65 × 10 <sup>6</sup>                             | 21 (32.3%)      | (54/65)                                    | GT1 (64.6)<br>GT 2 (1.4)<br>GT 3: (34)              | SOF + DCV<br>12 week: 44 PT*<br>24 week: 21 PT                         | 200+60                      | 100        | –          | Nausea: 5<br>Insomnia & headache: 4<br>pruritus: 1        |
| Surendra 2018 [25] | India   | 19              | 2016               | 44            | >800,000 IU/mL 12 (63%)<br>< 800,000 IU/mL 7 (37%) | 0               | (19/19)                                    | GT 1a (63)<br>GT 1b (37)                            | SOF + LDV<br>12 week: 19 PT                                            | 400+90                      | 100        | –          | Headache 1<br>Dizziness: 1                                |
| Manoj 2018 [26]    | India   | 71              | 2015-2017          | 42            | 6.12 (3.0-7.84)                                    | 17 (23.9%)      | (11/71)                                    | GT 1 (62)<br>GT1a (54.9)<br>GT1b (7.1)<br>GT 3 (38) | SOF + RBV(24 w)<br>SOF + LDV(12 w)<br>SOF + DCV(12w)<br>12 week: 60 PT | 400+200<br>400+90<br>400+60 | 100        | 98.5       | Fatigue: 32<br>Headache: 16<br>Insomnia: 11<br>Nausea: 13 |

|                        |                   |    |           |            |                        |               |         |             |                    |            |     |   |                                       |
|------------------------|-------------------|----|-----------|------------|------------------------|---------------|---------|-------------|--------------------|------------|-----|---|---------------------------------------|
|                        |                   |    |           |            |                        |               |         | GT3a (33.8) | 24 week: 17 PT     |            |     |   | Diarrhea: 15                          |
|                        |                   |    |           |            |                        |               |         | GT3b (4.2)  |                    |            |     |   | Anemia: 21                            |
| Akhil 2018<br>[16]     | India             | 22 | 2015-2016 | 49.8       | 2,642,495<br>IU/mL     | 0             | (22/22) | GT 1: 63.6  | SOF + RBV          | 400+200    | 100 | – | Anemia: 9                             |
|                        |                   |    |           |            |                        |               |         | GT 3: 27.2  | SOF + LDV          | 400+90     |     |   |                                       |
|                        |                   |    |           |            |                        |               |         | GT 4: 9     | SOF + DCV          | 400+60     |     |   |                                       |
|                        |                   |    |           |            |                        |               |         |             | 12 week: 22 PT     |            |     |   |                                       |
| Sperl 2017<br>[27]     | Czech<br>Republic | 6  | 2015-2016 | 39         | 4,088,000<br>IU/mL     | 2 (33.3%)     | (6/6)   | GT 3a: 100  | SOF + DCV          | 200+60     | 100 | – | Diarrhea: 1                           |
|                        |                   |    |           |            |                        |               |         |             | 12 week: 6 PT      |            |     |   |                                       |
| Dumortier<br>2017 [28] | France            | 50 | 2013-2015 | 60.5 (7.5) | 2 603 063 ±<br>427 061 | 0             | (35/50) | GT 1a(14)   | SOF + DCV          | 200+60     | 86  | – | Severe anemia: 3                      |
|                        |                   |    |           |            |                        |               |         | GT 1b (42)  | SOF + SMV          | 200+90     |     |   | Headache: 16                          |
|                        |                   |    |           |            |                        |               |         | GT 2 (12)   | 12 and 24 week     |            |     |   | Asthenia: 14                          |
|                        |                   |    |           |            |                        |               |         | GT 3 (10)   |                    |            |     |   | Diarrhea or nausea:<br>10 insomnia: 8 |
|                        |                   |    |           |            |                        |               |         | GT 4 (18)   |                    |            |     |   |                                       |
|                        |                   |    |           |            |                        |               |         | GT 5 (4)    |                    |            |     |   |                                       |
| Cox-North<br>2017 [29] | USA               | 29 | 2014-2016 | –          | –                      | 13<br>(44.8%) | (0/29)  | GT 1 (3.4)  | SOF + LDV          | 400+90     | 97  | – | anemia:3                              |
|                        |                   |    |           |            |                        |               |         | GT1a (48.6) | SOF + LDV +<br>RBV | 400+90+200 |     |   |                                       |
|                        |                   |    |           |            |                        |               |         | GT1b (20.7) |                    | 400+60     |     |   |                                       |
|                        |                   |    |           |            |                        |               |         | GT 2 (6.9)  | SOF + DCV          | 400+60+200 |     |   |                                       |

|                        |       |    |           |              |                         |            |         |                                                                   |                                                                               |                                      |      |   |                                                                       |
|------------------------|-------|----|-----------|--------------|-------------------------|------------|---------|-------------------------------------------------------------------|-------------------------------------------------------------------------------|--------------------------------------|------|---|-----------------------------------------------------------------------|
|                        |       |    |           |              |                         |            |         | GT3 (17.2)<br>GT 6 (3.4)                                          | SOF + DCV +<br>RBV<br>12 and 24 week                                          |                                      |      |   |                                                                       |
| Choudhary<br>2017 [30] | India | 16 | 2015-2016 | 45 (12)      | 7 (5-8)                 | 2 (12.5%)  | (16/16) | GT1 (68.7)<br>GT 3 (25)<br>GT4 (6.25)                             | PEGylated-<br>IFN+SOF+RBV<br><br>SOF+DCV<br>12 week: 16 PT                    | 135+400+200<br><br>400+60            | 80   | - | severe<br>thrombocytopenia: 1<br><br>fatigue: 2                       |
| Aggarwal<br>2017 [31]  | USA   | 14 | -         | 61 (4.9)     | 8375588.6<br>(12523305) | 12 (85.7%) | (14/14) | GT 1 (60)<br>GT 2 (6.7)<br>GT 3 (20)<br>GT4 (13.3)                | SOF + SMV<br><br>SOF + LDV<br><br>SOF + RBV<br>12 week: 9 PT<br>24 week: 5 PT | 400+150<br><br>400+90<br><br>400+200 | 92.8 | - | Headache: 1<br><br>Fatigue: 3<br><br>Acid reflux: 1                   |
| Agarwal 2017<br>[32]   | India | 62 | 2015-2016 | 33.8 (10.2)  | $10^6(10^4-10^8)$       | 3 (4.8%)   | (62/62) | GT1 (64.5)<br>GT 2 (1.6)<br>GT 3 (29)<br>GT 4 (3.2)<br>GT 6 (1.6) | SOF + RBV<br><br>SOF + DAC<br>12 week: 62 PT                                  | 400+200<br><br>400 + 60              | 95.2 | - | Dyspepsia: 13<br><br>Tuberculosis: 4<br><br>bacterial<br>pneumonia: 3 |
| Singh<br>2016 [33]     | USA   | 8  | 2014-2015 | 56.8<br>(20) | 4.2 ± 6.9               | 3 (37%)    | (8/8)   | GT 1a (37)<br>GT 1b (37)<br>GT3 (12.5)                            | SOF + SMV<br><br>SOF + LDV<br>12 week: 8                                      | 400 + 150<br><br>400 + 90            | 100  | - | nausea,vomiting:1<br><br>headache: 1<br><br>insomnia: 1               |

|                     |         |    |           |             |                                       |            |         |                                                               |                                                                          |                                                                                 |      |      |                                                             |
|---------------------|---------|----|-----------|-------------|---------------------------------------|------------|---------|---------------------------------------------------------------|--------------------------------------------------------------------------|---------------------------------------------------------------------------------|------|------|-------------------------------------------------------------|
|                     |         |    |           |             |                                       |            |         | GT4 (12.5)                                                    |                                                                          |                                                                                 |      |      |                                                             |
| Saxena 2016 [34]    | USA     | 17 | _         | ≥65         | 1.6 (0.5–4.3)                         | -          | -       | GT 1a (45)<br>GT 1b (20)<br>GT 2 (17)<br>GT 3 (9)<br>GT 4 (2) | SOF+PEG+ RBV<br>SOF + RBV<br>SOF + SMV<br>SOF+SMV+ RBV<br>12 week: 73 PT | SOF: 400 mg<br>RBV: 800 mg<br>(IQR: 400-1200)<br>SMV:150                        | 88   | _    |                                                             |
| Nazario 2016 [35]   | USA     | 17 | _         | 57          | HCV RNA level >800 000 IU/ml 13 (76%) | 8 (47%)    | (17/17) | GT 1a (76)                                                    | SOF + SMV                                                                | 400+150<br>12 week: 17                                                          | 100  | _    | Insomnia: 2<br>Nausea:1 Headache: 1<br>Anemia: 1            |
| Desnoyer 2016 [36]  | France  | 12 | 2014-2015 | 52          | 6.59                                  | 10 (83.4%) | (12/12) | GT 1a (25)<br>GT1b (41.6)<br>GT 1 (25)<br>GT 2 (8.3)          | SOF + SMV<br>SOF + LDV<br>SOF + DCV<br>SOF + RBV                         | 400 + 150<br>400 + 90<br>400 + 60<br>400 +200<br>12 week: 8 PT<br>24 week: 4 PT | 83.3 | 41.6 | Anemia:3<br>Headache:2                                      |
| Beinhardt 2016 [37] | Austria | 10 | _         | 50.6 (10.9) | 6.1 ± 0.8                             | 4 (40%)    | (10/10) | GT 1a (20)<br>GT 1b (40)<br>GT 3a (20)                        | SOF/SMV<br>SOF/DCV                                                       | 400+150<br>400+60<br>12 week: 10 PT                                             | 96   | 96   | Anemia:1<br>Thrombocytopenia:2<br>Hepatic encephalopathy: 1 |

|                    |       |    |           |             |                  |           |         |                                    |                                                        |                    |             |   |                                                                           |
|--------------------|-------|----|-----------|-------------|------------------|-----------|---------|------------------------------------|--------------------------------------------------------|--------------------|-------------|---|---------------------------------------------------------------------------|
|                    |       |    |           |             |                  |           |         | GT4a/c/d (10)                      |                                                        |                    |             |   | Pneumonia: 1<br>Peritonitis (Patient on PD): 1                            |
|                    |       |    |           |             |                  |           |         | GT 4h: 0<br>GT1b/3a: 0             |                                                        |                    |             |   |                                                                           |
| Hundemer 2015 [38] | USA   | 6  | 2014      | 60 (14)     | 2,990,000 IU/mL  | 3(50%)    | (6/6)   | GT1 (100)                          | SOF+ SMV<br>SOF+ RBV<br>12 week: 4 PT<br>24 week: 2 PT | 400+150<br>400+200 | 64          | – | Anemia: 3<br>Leukopenia: 1<br>AKI (Lupus like immune complex diseases): 1 |
| Goel 2018 [39]     | India | 41 | 2015-2017 | 41          | 5.90(4.1-9.9)    | 5 (12%)   | (41/41) | GT 1 (42)<br>GT 3 (54)<br>GT 4 (4) | SOF+DCV<br>12 week: 35 PT<br>24 week: 6 PT             | 200+60             | 90.2        | – | Acute mild pancreatitis: 1                                                |
| Gupta 2018 [40]    | India | 7  | 2015-2016 | 48.8 ± 14.5 | –                | 2 (28.6%) | (7/7)   | GT1 (71.4)                         | SOF+RBV<br>SOF+DCV<br>12 week: 5 PT<br>24 week: 2 PT   | 200+200<br>200+60  | 100         | – | Anemia: 1<br>Hypoglycemia: 1                                              |
| Mehta 2018 [41]    | India | 38 | 2016      | 49.5        | 5.75 (5.05–6.36) | –         | (26/26) | GT1a (42.1)<br>GT1b (57.9)         | SOF+LDV<br>SOF+DCV<br>12 week: 38                      | 400+90<br>400+60   | 100<br>92.3 | – | –                                                                         |

|                       |                                                                                                |     |           |           |               |            |          |                                                                                                                 |                                                                                                                        |                          |      |   |                                                                                       |
|-----------------------|------------------------------------------------------------------------------------------------|-----|-----------|-----------|---------------|------------|----------|-----------------------------------------------------------------------------------------------------------------|------------------------------------------------------------------------------------------------------------------------|--------------------------|------|---|---------------------------------------------------------------------------------------|
| Borgia 2019<br>[42]   | Canada, the<br>United<br>Kingdom,<br>Spain,<br><br>Israel, New<br>Zealand,<br>and<br>Australia | 59  | 2017-2018 | 60        | 5.8 (3.1–7.7) | 17 (29%)   | (59/59)  | GT 1 (46)<br><br>GT 1a (25)<br><br>GT 1b (19)<br><br>GT 2 (12)<br><br>GT 3 (32)<br><br>GT 4 (7)<br><br>GT 6 (3) | SOF+ Velpatasvir<br><br>12 week: 42 PT<br><br>24 week: 17 PT                                                           | 400+100                  | 95   | – | Headache: 10<br><br>Fatigue: 8<br><br>Nausea: 8<br><br>Vomiting: 8<br><br>Insomnia: 6 |
| Poustchi 2020<br>[43] | Iran                                                                                           | 103 | 2017-2018 | 50.3±13.5 | 1.2359        | 39 (37.9%) | (75/103) | G1 (51.5)<br><br>G2 (1.9)<br><br>G3 (26.2)<br><br>G4 (8.7)<br><br>Unknown(11.7)                                 | SOF + DCV<br><br>12 week: 64 PT<br><br>24 week: 39 PT                                                                  | 400 + 200                | 100  | – | Diarrhea: 3<br><br>Headache:4<br><br>Pruritus: 3<br><br>nausea: 3<br><br>somnia:2     |
| Eletreby 2020<br>[44] | Egypt                                                                                          | 579 | 2014-2018 | 52        | 0.39 × 106    | 107 (11%)  | 10/579   | NR                                                                                                              | IFN + SOF + RBV<br><br>SOF + RBV<br><br>SOF + DAC<br><br>SOF + DAC +<br>RBV<br><br>SOF + SIM<br><br>SOF + SIM +<br>DAC | SOF: 400<br><br>RBV: 600 | 96.7 | – | Anemia: 19<br><br>Leukopenia: 1<br><br>Thrombosis: 1                                  |

|                     |          |     |           |            |            |           |         |                                                        |                                                     |                      |      |      |                                                    |
|---------------------|----------|-----|-----------|------------|------------|-----------|---------|--------------------------------------------------------|-----------------------------------------------------|----------------------|------|------|----------------------------------------------------|
|                     |          |     |           |            |            |           |         |                                                        | 12 week: 579 PT                                     |                      |      |      |                                                    |
| Debnath 2020 [45]   | India    | 18  | 2017-2018 | 39.4 ± 8.3 | 2,35,000   | 0         | 18/18   | G1: (66.7)<br>G2: (5.5)<br>G3: (22.3)<br>G5: (5.5)     | SOF + LDV<br>SOF + DCV<br>12 week: 18               | 400 + 90<br>400 + 60 | 100  | –    | Nausea & dyspepsia: 4<br>Fatigue: 2<br>Headache: 1 |
| Michels 2020 [46]   | Brazil   | 241 | 2016-2017 | 60.7±10.4  | NR         | 0         | 34/241  | G1: (85.5)<br>G2: (2.5)<br>G3: (12)                    | SOF + DCV<br>SOF + SMV<br>SOF + RBV<br>12 week: 241 | SOF: 400<br>RBV: 250 | 99.3 | 97.1 | Anemia: 1                                          |
| Cheema 2019 [47]    | Pakistan | 18  | 2017-2018 | 47.2±14.1  | 5.88 ± 6.0 | 4 (22.2%) | 18/18   | G1: (33.4)<br>G3: (66.7)                               | SOF + DCV<br>12 week: 14<br>24 week: 4              | 400 + 60             | 83.3 | 83.3 | NR                                                 |
| Mandhwani 2020 [48] | Pakistan | 133 | 2016-2018 | 31.9 ± 9.8 | NR         | 0         | 133/133 | G1: 67 (50.3)<br>G2: (0.7)<br>G3: (42.9)<br>G4: (1.48) | SOF+DAC<br>12 weeks: 133                            | 400 + 60             | 96.9 | –    | Anemia: 58<br>Seizure: 1                           |
| Seo 2020 [49]       | Korea    | 9   | 2017-2018 | 59.9       | NR         | 2 (22.2%) | 9/9     | NR                                                     | SOF + RBV<br>12 weeks: 9                            | 400 + (100 to 200)   | 100  | –    | Anemia: 5<br>Insomnia: 1                           |



|  |  |  |  |  |  |  |  |  |  |  |  |  |  |            |
|--|--|--|--|--|--|--|--|--|--|--|--|--|--|------------|
|  |  |  |  |  |  |  |  |  |  |  |  |  |  | Nausea: 1  |
|  |  |  |  |  |  |  |  |  |  |  |  |  |  | Itching: 2 |
|  |  |  |  |  |  |  |  |  |  |  |  |  |  | Fatigue: 2 |

†SVR=Sustained virological response; ‡SD=Standard deviation; §PT=Patient; ¶GT=Genotype

**S2 Table. Severe adverse event, discontinuation rate and mortality rate.**

| Study          | No. of patient | No. of patient with SAE (%) | Description of SAE                                                                                                                                     | Number of discontinuations | Number/description of Mortality rate                                   |
|----------------|----------------|-----------------------------|--------------------------------------------------------------------------------------------------------------------------------------------------------|----------------------------|------------------------------------------------------------------------|
| Beinhardt 2016 | 10             | 5 (50%)                     | recurring peritonitis, renal anemia, graft failure after orthotropic liver transplantation (OLT), cirrhosis due to HCV recurrence after OLT, pneumonia | –                          | –                                                                      |
| Hundemer 2015  | 6              | –                           | –                                                                                                                                                      | 1 (0.16)                   | –                                                                      |
| Goel 2018      | 41             | 2 (4.9%)                    | acute mild pancreatitis after renal transplantation: 1<br>worsening of ascites: 1                                                                      | 2 (0.05)                   | 3 (0.07)<br>3 PT: Not due to treatment                                 |
| Gupta 2018     | 7              | –                           | –                                                                                                                                                      | 1 (0.14)                   | 1 (0.14)<br>1 PT: NR*                                                  |
| Borgia 2019    | 59             | 11 (19%)                    | increased daytime urinary frequency<br>renal colic                                                                                                     | 1 (0.02)                   | 2 (0.03)<br>1 PT: from suicide<br>1 PT: died of metastatic lung cancer |
| Aggarwal 2017  | 14             | –                           | –                                                                                                                                                      | 2 (0.14)                   | 1 (0.07)                                                               |

|                |     |          |                                                                                                                             |           |                                                                                          |
|----------------|-----|----------|-----------------------------------------------------------------------------------------------------------------------------|-----------|------------------------------------------------------------------------------------------|
|                |     |          |                                                                                                                             |           | 1 PT: NR                                                                                 |
| Cox-North 2017 | 29  | 1 (3.4%) | cardiac event (unable to draw any conclusions about the safety of SOF regimens in those with underlying cardiac disease): 1 | –         | 1 (0.03)<br>1 PT: myocardial infarction                                                  |
| Dumortier 2017 | 50  | –        | –                                                                                                                           | –         | 2 (0.04)<br>2 PT: liver failure<br>1 PT: unknown reasons                                 |
| Poustchi 2020  | 103 | –        | NR                                                                                                                          | –         | 3 (0.03)<br>1 PT: Bladder cancer<br>1 PT: myocardial infarction<br>1 PT: pulmonary edema |
| Eletreby 2019  | 579 | 4 (0.69) | Hematological complications: 2<br>Worsening renal functions: 2                                                              | 2 (0.003) | 1 (0.002)<br>1 PT: unknown reasons                                                       |
| Debnath 2020   | 18  | –        | –                                                                                                                           | –         | 2 (0.11)                                                                                 |

|               |     |   |   |          |                                                               |
|---------------|-----|---|---|----------|---------------------------------------------------------------|
|               |     |   |   |          | 1 PT: due to inadequate hemodialysis<br>1 PT: unknown reasons |
| Michels 2020  | 241 | - | - | 1 (0.03) | -                                                             |
| Cheema 2019   | 18  | - | - | 3 (0.17) | -                                                             |
| Surendra 2018 | 19  | - | - | -        | 2 (0.11)<br>2 PT: inadequate dialysis                         |

†SAE=Severe adverse event; ‡NR=Not reported; §PT=Patient; ¶OLT= Orthotropic liver transplantation

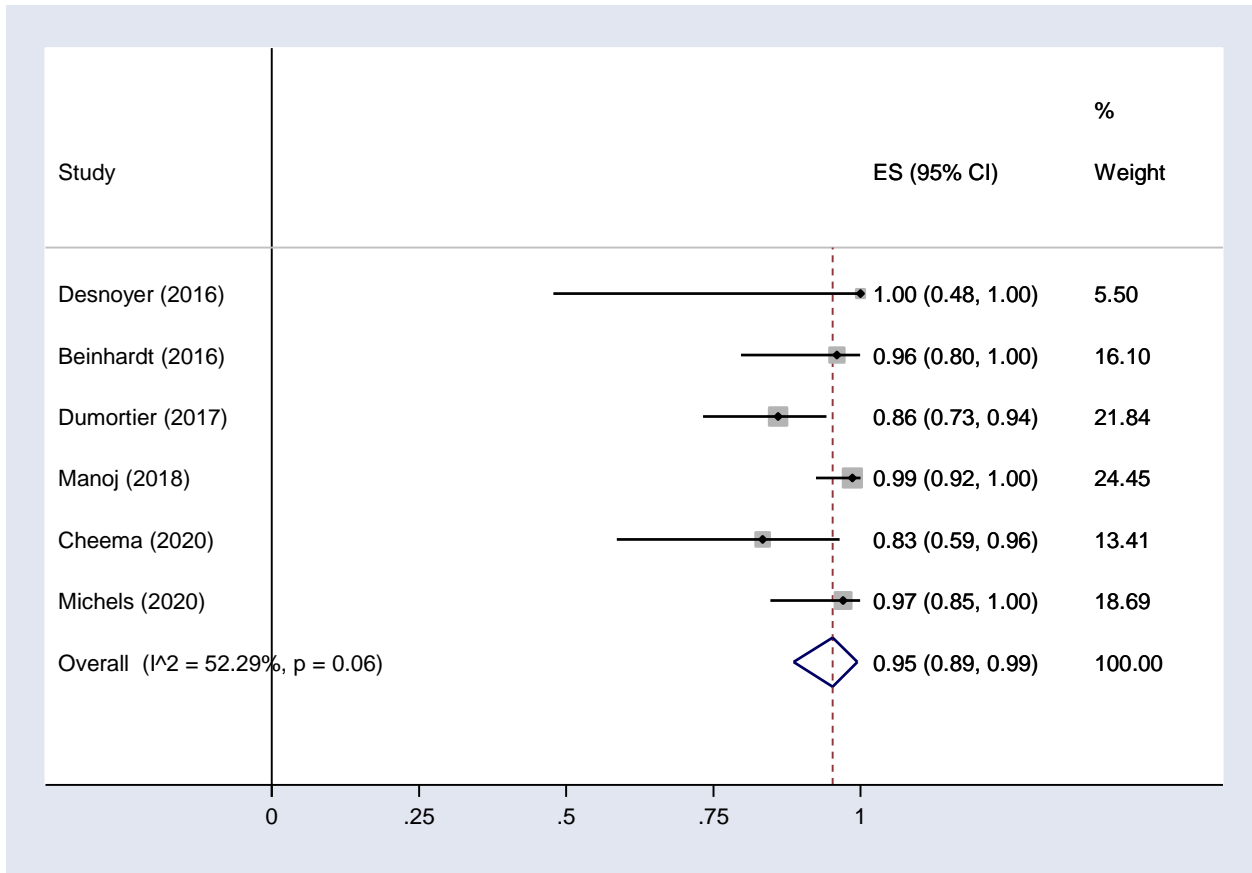

**S1 Fig. Forest plot of pooled SVR24 rate in HCV-infected patients with advanced chronic kidney disease**

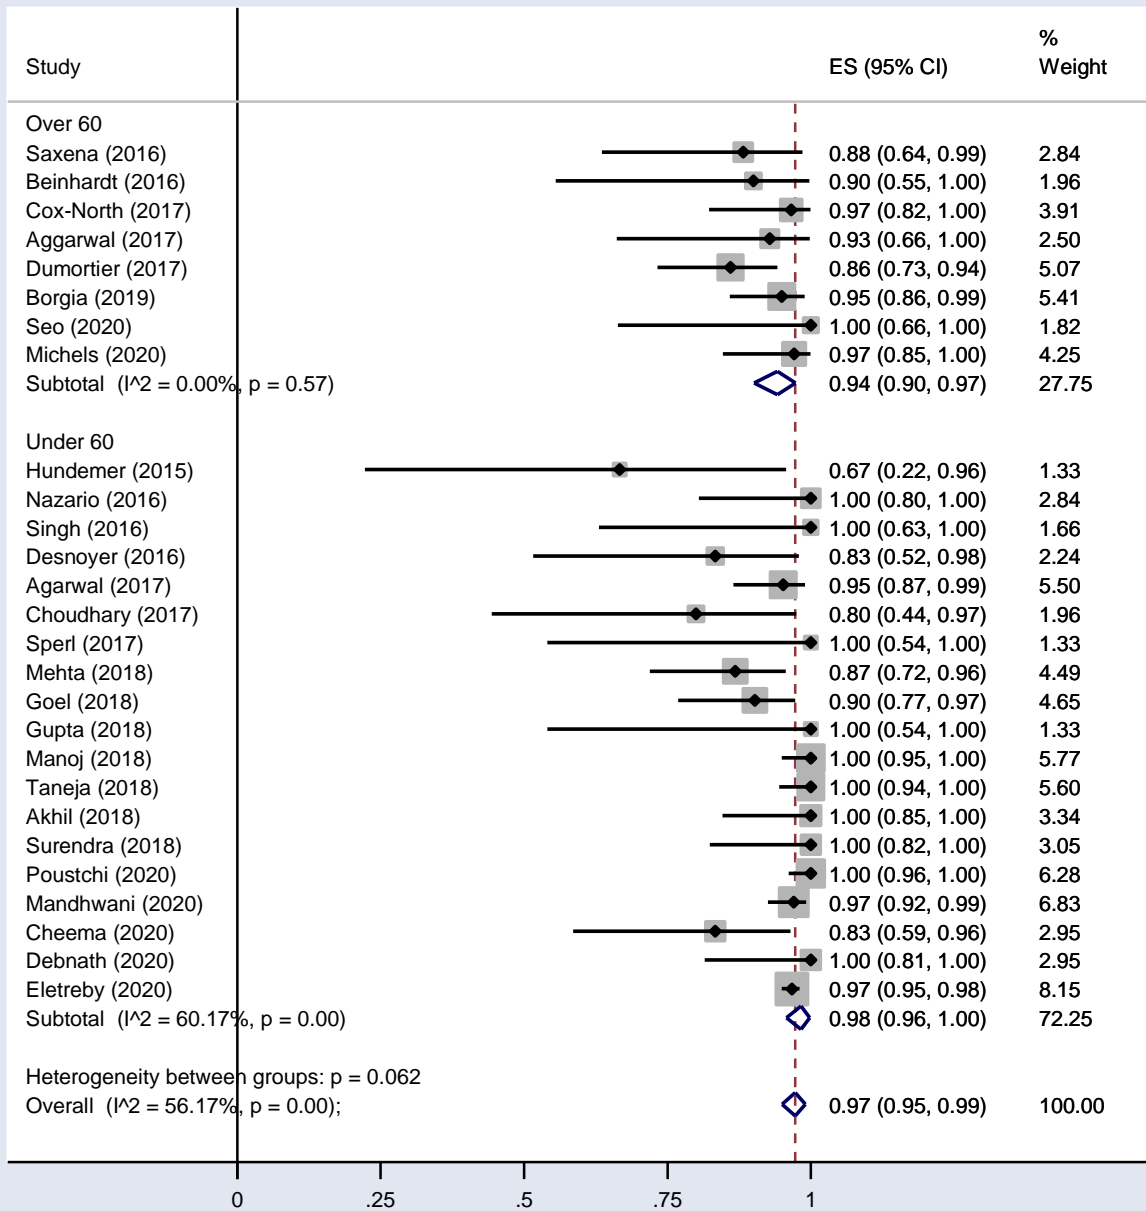

**S2 Fig. Forest plot of pooled SVR12 rate in HCV-infected patients with advanced chronic kidney disease stratified by the age group**

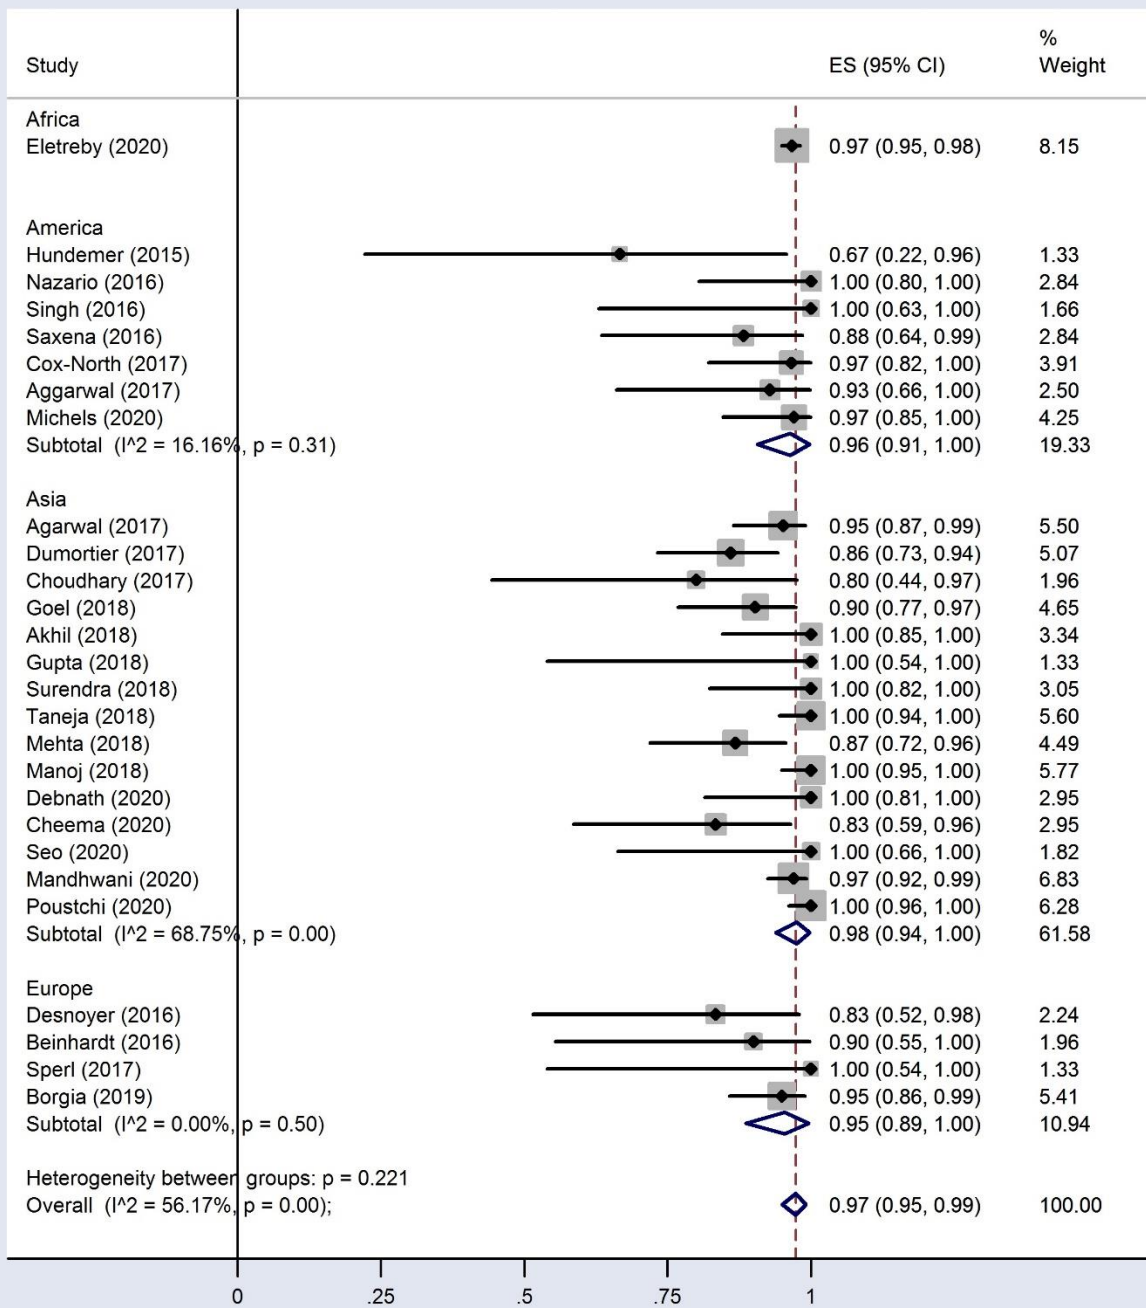

**S3 Fig. Forest plot of pooled SVR12 rate in HCV-infected patients with advanced chronic kidney disease by the region of study**

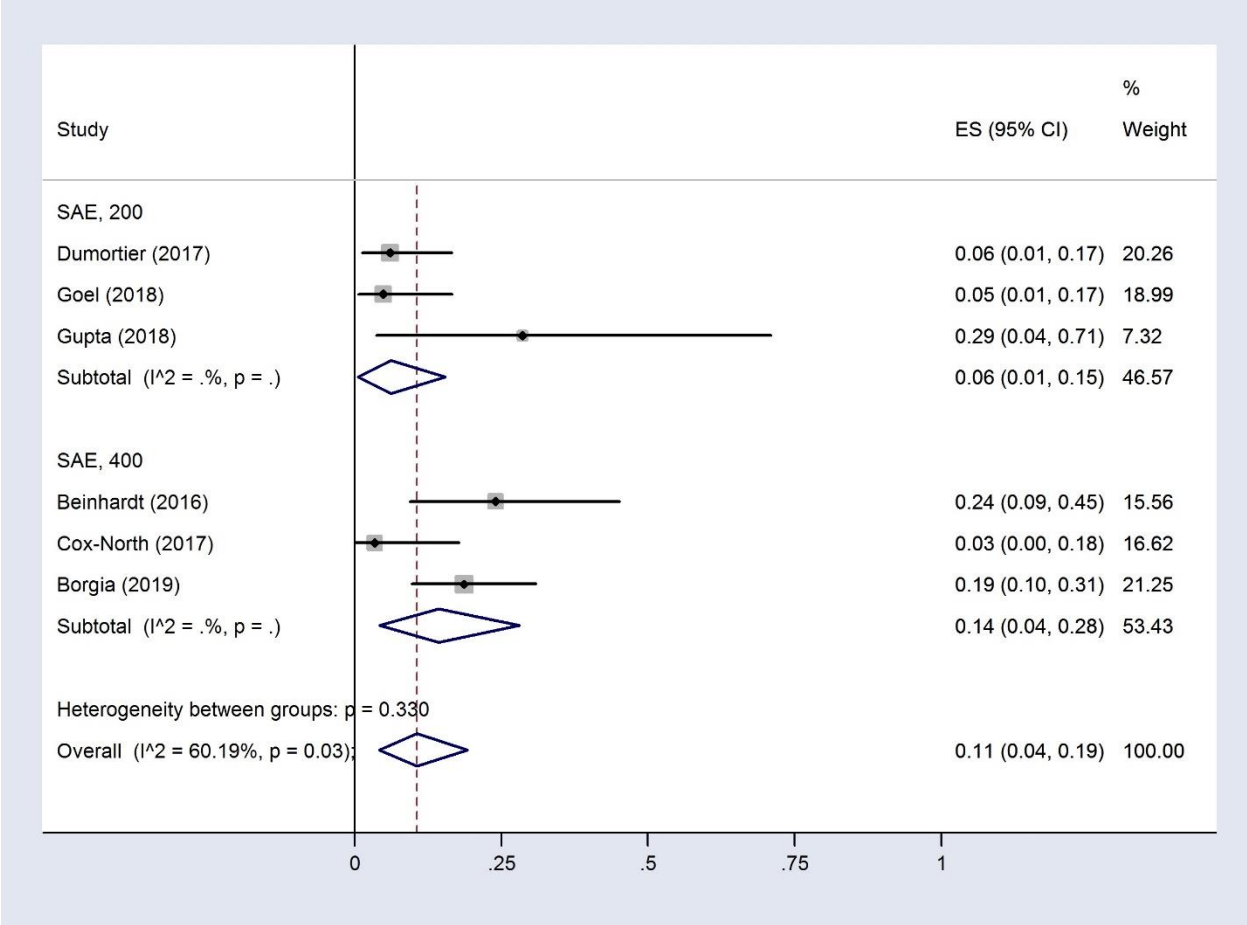

**S4 Fig. The forest plot for incidence of severe adverse events among included studies**



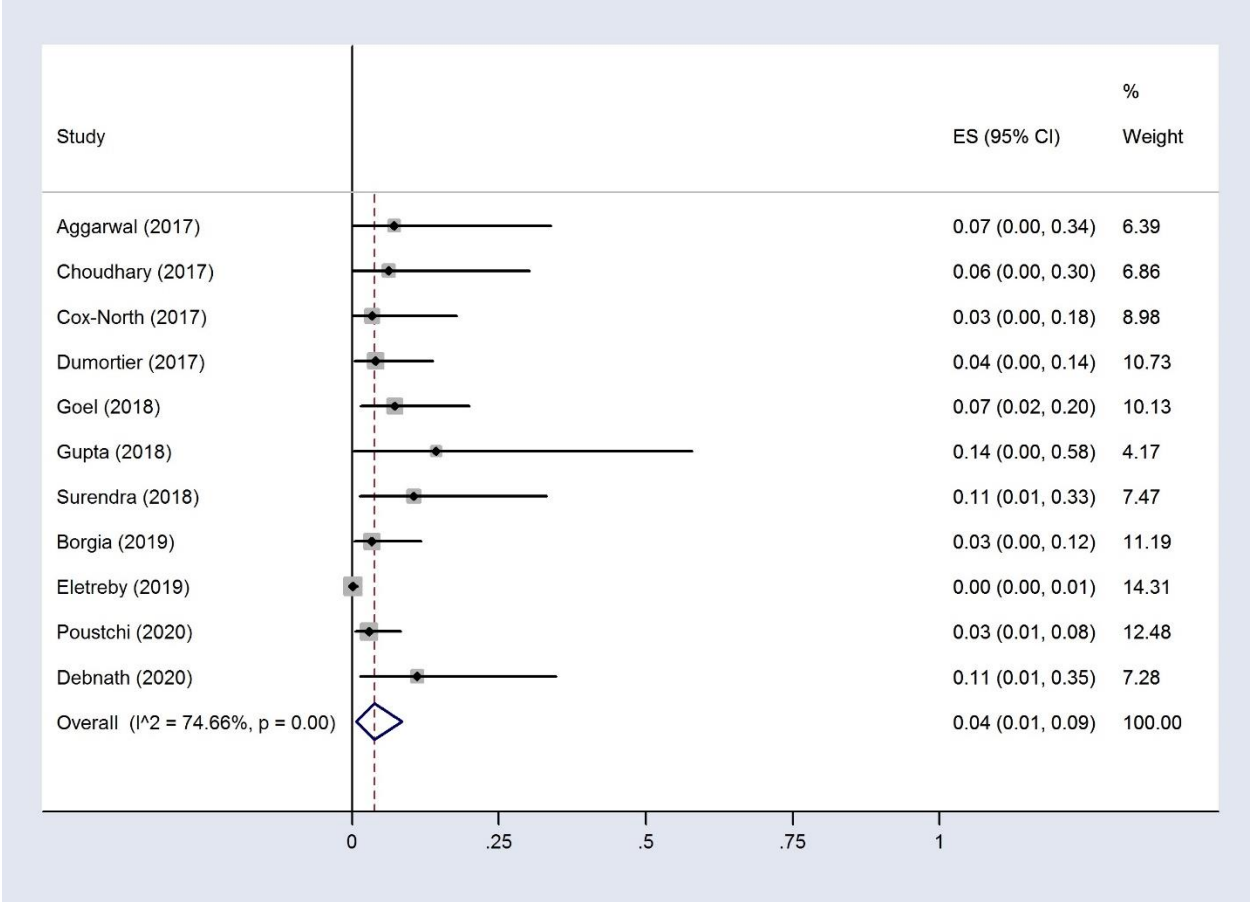

**S5 Fig. The forest plot of pooled mortality rate among included studies**

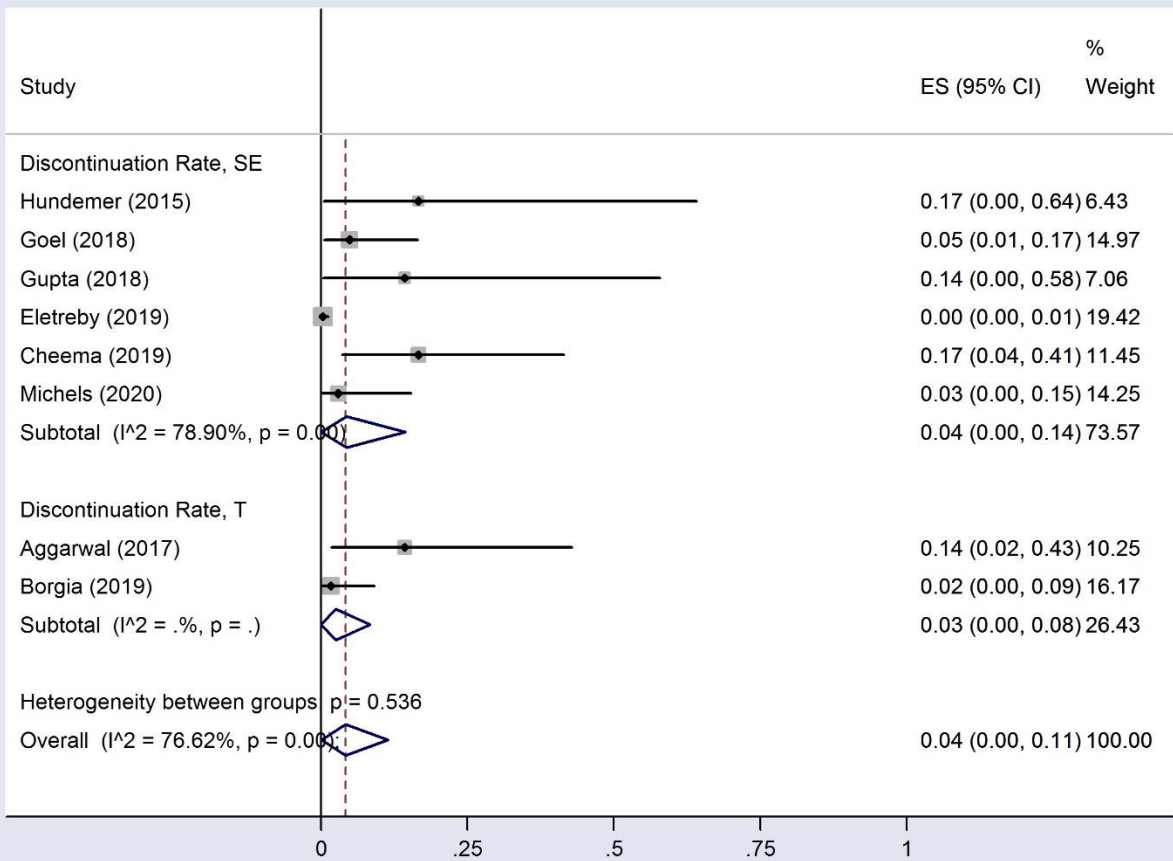

**S6 Fig. The forest plot for incidence of discontinuation rate among included studies**
